# Supplementary material for: Branched-Chain Amino Acid Database Integrated in MEDIPAD Software as a Tool for Nutritional Investigation of Mediterranean Populations
Source: PubMed Central journal article supplement (PMC6213539; doi:10.3390/nu10101392), 2018-10-01
Supplement: nutrients-10-01392-s001.pdf [file nutrients-10-01392-s001.pdf]

# Supplementary material

Figure S1. Screenshot of the MEDIPAD software illustrating the registration of 24HDR for the breakfast

The screenshot displays the MEDIPAD software interface for food registration. The top navigation bar includes the MEDIGENE MAGDB logo, menu items (Accueil, Administration des aliments, Administration), language options (EN, ES, FR, RO), and a user profile (Aide, Florin Grigorescu). The left sidebar shows a navigation menu for 'Enquête alimentaire' (Test 24032015) with sections for 'Premier jour', 'Deuxième jour', and 'Troisième jour', each containing 'Petit-déjeuner', 'Déjeuner', 'Diner', and 'Collation'. The main content area is divided into two sections: 'Premier jour | Petit-déjeuner' and 'Premier jour | Déjeuner'. The 'Petit-déjeuner' section lists three items: 'Pain, baguette, courante' (1 tranche - 30 g x3, 90 g), 'Fromage type Feta, au lait de vache' (1 portion - 30 g x2, 60 g), and 'Houmous' (1 cuillère à soupe - 20 g x1, 20 g). The 'Déjeuner' section lists one item: 'Poulet basquaise au riz' (1 portion - 300 g, 200 g). A search bar at the top of the main area contains the text 'Chercher un aliment' and a search icon. Below the search bar is a row of food category icons. At the bottom right, there are 'Annuler' and 'Sauver' buttons.

Chercher un aliment

**Premier jour | Petit-déjeuner**

|                                       |                              |   |    |   |
|---------------------------------------|------------------------------|---|----|---|
| × Pain, baguette, courante            | 1 tranche - 30 g x3          | Q | 90 | g |
| × Fromage type Feta, au lait de vache | 1 portion - 30 g x2          | Q | 60 | g |
| × Houmous                             | 1 cuillère à soupe - 20 g x1 | Q | 20 | g |

**Premier jour | Déjeuner**

|                           |                       |   |     |   |
|---------------------------|-----------------------|---|-----|---|
| × Poulet basquaise au riz | 1 portion - 300 g ... | Q | 200 | g |
|---------------------------|-----------------------|---|-----|---|

Annuler Sauver

**Figure S2.** Screenshot of the MEDIPAD software illustrating the registration of 24HDR for breakfast in the first day and possible corrections to assess quantity of foods.

The screenshot displays the MEDIPAD software interface for food registration. The top navigation bar includes the MEDIGENE MAGDB logo, language options (EN, ES, FR, RO), an 'Aide' link, and a user profile for Florin Grigorescu. The main content area is divided into a left sidebar and a central panel.

**Left Sidebar (Enquête alimentaire):**

- Retour
- Enquête alimentaire (Test 24032015)
- Premier jour (selected)
- Petit-déjeuner
- Déjeuner
- Dîner
- Collation
- Deuxième jour
- Petit-déjeuner
- Déjeuner
- Dîner
- Collation
- Troisième jour
- Petit-déjeuner
- Déjeuner
- Dîner
- Collation

**Central Panel (Premier jour - 1272 kCal):**

- Petit-déjeuner:**
  - 90 g > Pain, baguette, courante
  - 60 g > Fromage type Feta, au lait de vache
  - 20 g > Houmous
- Déjeuner:**
  - 200 g > Poulet basquaise au riz
- Dîner:**
  - 90 g > Poisson pané, frit
  - 200 g > Pâtes alimentaires cuites
- Collation:**
  - 250 g > Jus multifruit, pur jus, multivitaminé

**Deuxième jour - 1320 kCal:**

- Petit-déjeuner:**
  - 92 g > Oeuf au plat, frit, salé
  - 40 g > Pain grillé, domestique
- Déjeuner:**

**Right Panel (Detailed View):**

This panel shows a detailed view of the breakfast items with their quantities and weights:

- 1 tranche - 30 g x3 Q 90 g
- 1 portion - 30 g x2 Q 60 g
- 1 cuillère à soupe - 20 g x1 Q 20 g

At the bottom right, there is a 'Sauver' (Save) button and an 'Annuler' (Cancel) link.

**Figure S3.** Distribution of BCAA content by centiles in CIQUAL French database and food items from SPI surveys

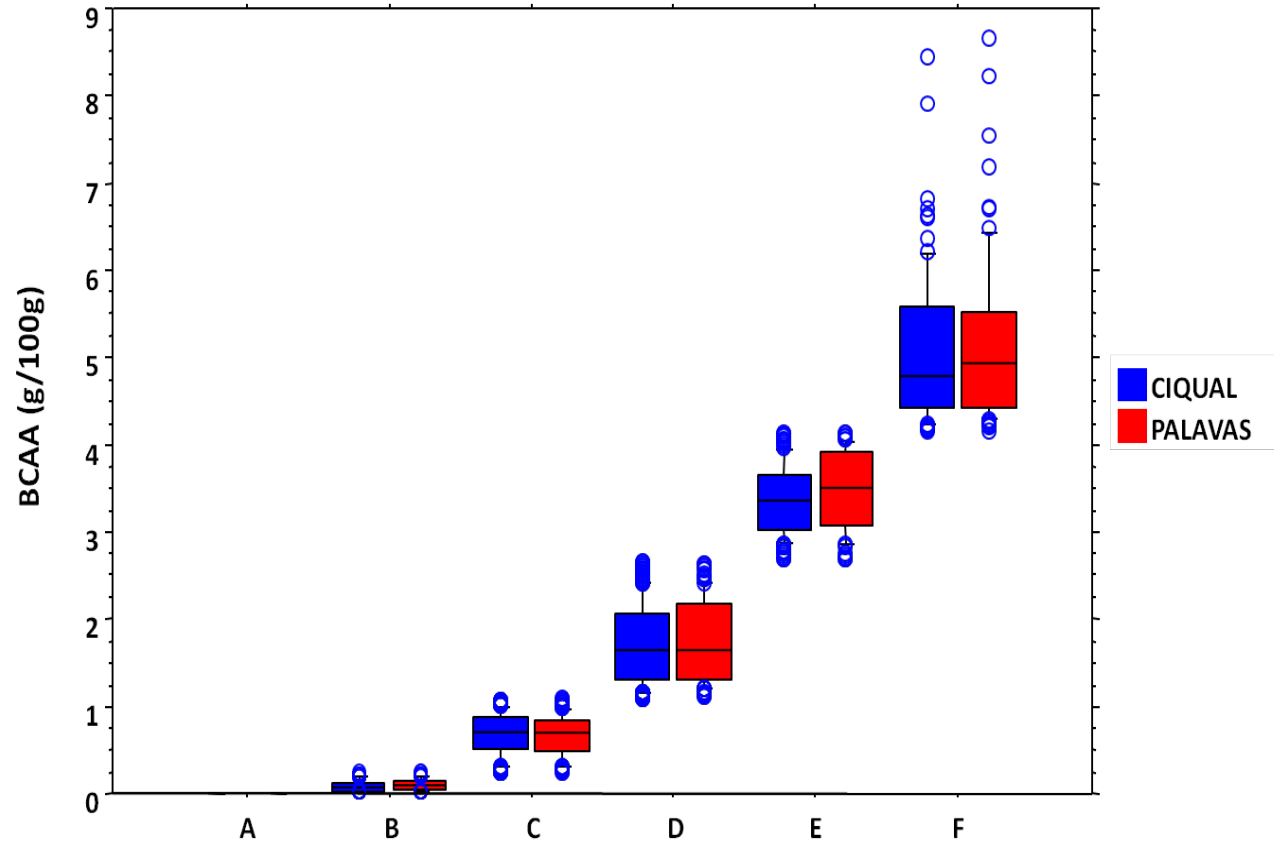

**Table S1.** Mean BCAA content (g/100 g) by food groups in 1331 compiled food items of CIQUAL

| <b>Food Groups</b>                    | <b>BCAA content</b> |
|---------------------------------------|---------------------|
| Dairy products & cheese               | 2.37 ± 0.07         |
| Vegetables, fruits                    | 0.50 ± 0.08         |
| Cereals & Pasta                       | 1.17 ± 0.07         |
| Meat, poultry & fish                  | 3.62 ± 0.06         |
| Sugars & confectionery                | 0.61 ± 0.18         |
| Fats & oils                           | 0.08 ± 0.17         |
| Beverages                             | 0.06 ± 0.08         |
| Sauces & condiments                   | 0.68 ± 0.14         |
| Mixed dishes & Soups                  | 1.63 ± 0.08         |
| Items for particular nutritional uses | 0.54 ± 0.77         |

Values are expressed as Mean ± SE

**Table S2.** Clinical features of patients from the SPI collection stratified by BMI

|                          | <b>Normal weight</b> | <b>Obese</b>    | <b>P-value (t-test)</b> |
|--------------------------|----------------------|-----------------|-------------------------|
| n                        | 1659                 | 1298            | NA                      |
| Age (years)              | 12.00 ± 0.05         | 12.16 ± 0.06    | 0.057                   |
| BMI (kg/m <sup>2</sup> ) | 22.02 ± 0.09         | 30.55 ± 0.14    | < 0.0001                |
| Energy intake (Kcal/d)   | 2264.64 ± 12.14      | 2537.00 ± 15.33 | < 0.0001                |
| Protein intake (g/d)     | 102.95 ± 0.56        | 114.41 ± 0.68   | < 0.0001                |
| BCAA intake (g/d)        | 17.70 ± 0.10         | 19.56 ± 0.12    | < 0.0001                |

**Table S3.** Contribution of food groups to total and individual BCAA intake in age category 9 – 13 years old in SPI survey stratified by gender and nutritional status.

| Food Groups                | Isoleucine |          |            |          |           |         | Leucine    |          |            |          |           |         | Valine      |          |            |          |           |         |
|----------------------------|------------|----------|------------|----------|-----------|---------|------------|----------|------------|----------|-----------|---------|-------------|----------|------------|----------|-----------|---------|
|                            | Female NBW | Male NBW | Female OVW | Male OVW | Female OB | Male OB | Female NBW | Male NBW | Female OVW | Male OVW | Female OB | Male OB | Females NBW | Male NBW | Female OVW | Male OVW | Female OB | Male OB |
| Offals                     | 0.00       | 0.00     | 0.05       | 0.00     | 0.04      | 0.04    | 0.00       | 0.00     | 0.05       | 0.00     | 0.05      | 0.05    | 0.00        | 0.00     | 0.05       | 0.00     | 0.04      | 0.00    |
| Red meat & poultry         | 39.32      | 36.85    | 33.79      | 34.46    | 35.53     | 36.64   | 41.06      | 38.58    | 35.41      | 35.77    | 37.31     | 38.37   | 36.33       | 34.32    | 31.03      | 31.54    | 32.70     | 33.85   |
| Luncheon meats             | 2.80       | 3.69     | 3.84       | 3.72     | 3.36      | 3.46    | 2.71       | 3.32     | 3.86       | 3.68     | 3.30      | 3.45    | 2.45        | 2.95     | 3.49       | 3.32     | 2.93      | 3.07    |
| Fish & seafood             | 1.58       | 2.47     | 2.44       | 2.05     | 2.40      | 1.65    | 1.71       | 2.21     | 2.64       | 2.14     | 2.59      | 1.79    | 1.52        | 2.00     | 2.34       | 1.89     | 2.30      | 1.58    |
| Milk & dairy products      | 15.49      | 16.30    | 16.63      | 17.17    | 15.47     | 16.23   | 16.16      | 17.09    | 17.40      | 17.88    | 16.29     | 16.94   | 17.19       | 18.11    | 18.19      | 18.71    | 16.92     | 17.70   |
| Cheese                     | 11.23      | 10.79    | 12.18      | 12.68    | 12.27     | 11.37   | 6.89       | 6.86     | 7.47       | 8.67     | 7.19      | 6.67    | 12.06       | 11.65    | 13.00      | 13.72    | 13.15     | 12.17   |
| Eggs & related products    | 1.15       | 0.71     | 1.36       | 1.13     | 1.22      | 0.92    | 1.13       | 0.70     | 1.33       | 1.11     | 1.20      | 0.90    | 1.28        | 0.79     | 1.50       | 1.25     | 1.35      | 1.01    |
| Bread, Pasta, cereals      | 16.86      | 18.79    | 15.63      | 16.11    | 16.35     | 16.70   | 17.97      | 20.11    | 16.75      | 17.22    | 17.68     | 17.93   | 17.24       | 19.30    | 15.87      | 16.39    | 16.71     | 17.06   |
| Pastries & brioches        | 2.66       | 2.22     | 2.21       | 2.34     | 2.49      | 2.36    | 2.84       | 2.40     | 2.40       | 2.48     | 2.72      | 2.52    | 2.72        | 2.29     | 2.25       | 2.38     | 2.56      | 2.42    |
| Cakes                      | 0.70       | 0.61     | 0.76       | 0.56     | 0.60      | 0.48    | 0.69       | 0.62     | 0.76       | 0.56     | 0.61      | 0.48    | 0.70        | 0.62     | 0.77       | 0.56     | 0.61      | 0.48    |
| Fruits & vegetables        | 1.94       | 1.87     | 2.00       | 1.70     | 1.79      | 1.54    | 1.99       | 1.81     | 1.91       | 1.62     | 1.72      | 1.45    | 1.66        | 1.62     | 1.69       | 1.44     | 1.52      | 1.30    |
| Legumes                    | 3.01       | 2.70     | 4.86       | 4.94     | 5.00      | 5.21    | 3.34       | 3.01     | 5.42       | 5.49     | 5.61      | 5.80    | 3.21        | 2.90     | 5.15       | 5.24     | 5.33      | 5.55    |
| Nuts & Seeds               | 0.03       | 0.02     | 0.02       | 0.07     | 0.02      | 0.02    | 0.03       | 0.02     | 0.02       | 0.08     | 0.02      | 0.02    | 0.03        | 0.02     | 0.02       | 0.08     | 0.02      | 0.02    |
| Mixed Dishes               | 1.54       | 1.22     | 2.17       | 1.04     | 1.39      | 1.57    | 1.69       | 1.30     | 2.36       | 1.10     | 1.49      | 1.68    | 1.62        | 1.27     | 2.23       | 1.05     | 1.42      | 1.59    |
| Fats & oil                 | 0.07       | 0.07     | 0.06       | 0.06     | 0.06      | 0.06    | 0.08       | 0.08     | 0.06       | 0.06     | 0.06      | 0.07    | 0.08        | 0.08     | 0.06       | 0.06     | 0.06      | 0.07    |
| Sugar and confectionery    | 0.95       | 1.02     | 1.32       | 1.32     | 1.38      | 1.16    | 1.09       | 1.24     | 1.54       | 1.53     | 1.57      | 1.33    | 1.14        | 1.23     | 1.58       | 1.57     | 1.66      | 1.39    |
| Drinks                     | 0.64       | 0.60     | 0.56       | 0.57     | 0.51      | 0.47    | 0.58       | 0.57     | 0.51       | 0.54     | 0.47      | 0.44    | 0.74        | 0.77     | 0.69       | 0.72     | 0.63      | 0.60    |
| Herbs, Spices & condiments | 0.05       | 0.08     | 0.11       | 0.07     | 0.11      | 0.12    | 0.04       | 0.08     | 0.10       | 0.07     | 0.11      | 0.12    | 0.04        | 0.08     | 0.11       | 0.07     | 0.10      | 0.12    |

NBW, normal body weight; OVW, overweight; OB, obese

**Table S4** Contribution of food groups to total and individual BCAA intake in age category 14 – 18 years old in SPI surveys stratified by gender and nutritional status

| Food Groups                | Isoleucine |          |            |          |           |         | Leucine    |          |            |          |           |         | Valine     |          |            |          |           |         |
|----------------------------|------------|----------|------------|----------|-----------|---------|------------|----------|------------|----------|-----------|---------|------------|----------|------------|----------|-----------|---------|
|                            | Female NBW | Male NBW | Female OVW | Male OVW | Female OB | Male OB | Female NBW | Male NBW | Female OVW | Male OVW | Female OB | Male OB | Female NBW | Male NBW | Female OVW | Male OVW | Female OB | Male OB |
| Offals                     | 0.00       | 0.00     | 0.00       | 0.00     | 0.00      | 0.00    | 0.00       | 0.00     | 0.00       | 0.00     | 0.00      | 0.00    | 0.00       | 0.00     | 0.00       | 0.00     | 0.00      | 0.00    |
| Red meat & poultry         | 37.59      | 40.54    | 37.04      | 39.33    | 38.04     | 38.82   | 38.99      | 41.77    | 38.59      | 41.59    | 39.57     | 40.42   | 34.74      | 37.66    | 34.28      | 36.56    | 35.20     | 35.95   |
| Luncheon meats             | 2.98       | 3.31     | 3.88       | 3.58     | 2.91      | 3.12    | 2.49       | 2.87     | 3.50       | 3.42     | 2.94      | 3.20    | 2.18       | 2.58     | 3.08       | 3.09     | 2.67      | 2.87    |
| Fish & seafood             | 2.79       | 0.37     | 2.45       | 0.52     | 1.99      | 1.38    | 2.97       | 0.39     | 2.66       | 0.56     | 2.14      | 1.45    | 2.70       | 0.36     | 2.35       | 0.50     | 1.92      | 1.34    |
| Milk & dairy products      | 17.86      | 14.79    | 15.86      | 14.74    | 15.06     | 13.48   | 18.69      | 15.32    | 16.66      | 15.45    | 15.59     | 13.95   | 20.05      | 16.58    | 17.69      | 16.08    | 16.33     | 14.64   |
| Cheese                     | 9.33       | 9.03     | 10.57      | 11.31    | 11.25     | 10.03   | 5.82       | 5.91     | 6.59       | 6.23     | 7.17      | 5.68    | 10.00      | 9.86     | 11.54      | 12.07    | 12.25     | 10.74   |
| Eggs and related products  | 1.53       | 1.25     | 0.73       | 1.01     | 0.63      | 1.00    | 1.49       | 1.21     | 0.72       | 0.99     | 0.62      | 0.97    | 1.70       | 1.39     | 0.82       | 1.11     | 0.70      | 1.11    |
| Bread, Pasta, cereals      | 16.16      | 18.72    | 16.46      | 17.34    | 16.93     | 17.53   | 17.24      | 19.82    | 17.63      | 18.65    | 18.07     | 18.59   | 16.54      | 19.19    | 16.89      | 17.84    | 17.32     | 17.97   |
| Pastries & brioches        | 1.69       | 1.88     | 2.16       | 1.60     | 2.37      | 2.41    | 1.80       | 2.04     | 2.30       | 1.71     | 2.53      | 2.55    | 1.74       | 1.90     | 2.24       | 1.65     | 2.44      | 2.48    |
| cakes                      | 0.72       | 0.74     | 0.47       | 0.68     | 0.70      | 0.91    | 0.72       | 0.73     | 0.47       | 0.68     | 0.69      | 0.89    | 0.72       | 0.76     | 0.47       | 0.68     | 0.71      | 0.92    |
| Fruits & vegetables        | 2.31       | 1.73     | 2.40       | 1.50     | 2.13      | 1.54    | 2.18       | 1.62     | 2.24       | 1.42     | 1.97      | 1.44    | 1.96       | 1.45     | 2.02       | 1.30     | 1.81      | 1.34    |
| Legumes                    | 3.43       | 3.43     | 4.12       | 5.96     | 3.90      | 5.05    | 3.80       | 3.78     | 4.58       | 6.66     | 4.32      | 5.59    | 3.67       | 3.67     | 4.41       | 6.37     | 4.17      | 5.40    |
| Nuts & Seeds               | 0.05       | 0.05     | 0.12       | 0.00     | 0.12      | 0.16    | 0.06       | 0.06     | 0.11       | 0.00     | 0.13      | 0.18    | 0.05       | 0.06     | 0.13       | 0.00     | 0.13      | 0.17    |
| Mixed Dishes               | 1.94       | 2.63     | 1.78       | 0.89     | 2.17      | 2.64    | 2.08       | 2.89     | 1.92       | 0.98     | 2.32      | 2.93    | 1.99       | 2.72     | 1.84       | 0.92     | 2.20      | 2.73    |
| Fats & oil                 | 0.05       | 0.06     | 0.06       | 0.06     | 0.07      | 0.06    | 0.05       | 0.06     | 0.06       | 0.07     | 0.08      | 0.06    | 0.05       | 0.07     | 0.06       | 0.07     | 0.08      | 0.06    |
| Sugar and confectionery    | 0.94       | 0.85     | 1.16       | 1.11     | 1.19      | 1.38    | 1.06       | 0.96     | 1.31       | 1.26     | 1.34      | 1.60    | 1.14       | 1.03     | 1.39       | 1.32     | 1.43      | 1.65    |
| Drinks                     | 0.57       | 0.41     | 0.58       | 0.31     | 0.37      | 0.40    | 0.53       | 0.38     | 0.51       | 0.27     | 0.36      | 0.38    | 0.73       | 0.52     | 0.63       | 0.38     | 0.47      | 0.52    |
| Herbs, spices & condiments | 0.04       | 0.21     | 0.16       | 0.06     | 0.18      | 0.11    | 0.04       | 0.20     | 0.16       | 0.05     | 0.18      | 0.10    | 0.04       | 0.21     | 0.16       | 0.06     | 0.18      | 0.11    |

NBW, normal body weight ; OVW, overweight; OB, obese

**Table S5** Clinical features of patients from MEDIGENE collection stratified by gender

| Parameter                | Female          | Male           | P-value |
|--------------------------|-----------------|----------------|---------|
| <i>n</i>                 | 73              | 46             | NA      |
| Age (years)              | 46.50 ± 1.17    | 48.28 ± 1.21   | NS      |
| BMI (kg/m <sup>2</sup> ) | 28.21 ± 0.68    | 27.82 ± 0.47   | NS      |
| Obesity (%)              | 41.09           | 26.08          | NS      |
| Glycemia (mmol/L)        | 5.37 ± 0.15     | 5.92 ± 0.31    | NS      |
| Fast insulin (mU/ml)     | 8.22 ± 0.61     | 7.06 ± 0.69    | NS      |
| HOMA-IR                  | 2.04 ± 0.22     | 1.76 ± 0.21    | NS      |
| Insulin resistance (%)   | 31.50           | 23.91          | NS      |
| TG (mmol/L)              | 115.25 ± 7.26   | 134.16 ± 9.9   | NS      |
| HDL (mmol/L)             | 55.74 ± 2.01    | 48.25 ± 1.77   | NS      |
| MetS-ATPIII (%)          | 38.03           | 52.27          | NS      |
| Energy intake kcal/d     | 1969.13 ± 54.29 | 2252.15 ± 94.1 | 0.006   |
| Protein intake (g/d)     | 73.97 ± 2.24    | 81.22 ± 3.70   | NS      |
| Leucine (g/d)            | 5.76 ± 0.18     | 6.16 ± 0.28    | NS      |
| Isoleucine (g/d)         | 3.39 ± 0.11     | 3.63 ± 0.17    | NS      |
| Valine (g/d)             | 3.76 ± 0.11     | 4.04 ± 0.18    | NS      |
| Total BCAA (g/d)         | 12.91 ± 0.41    | 13.84 ± 0.63   | NS      |



**Table S6.** Mean intake of total and individual BCAA (g/d) stratified by BMI\* in MEDIGENE surveys

| Mean intake<br>(g/d) | Females                  |                |          |                            | Males                     |               |          |                            |
|----------------------|--------------------------|----------------|----------|----------------------------|---------------------------|---------------|----------|----------------------------|
|                      | Normal weight<br>(n =43) | Obese (n = 30) | P-value§ | Energy-adjusted<br>P-value | Normal weight<br>(n = 34) | Obese (n =12) | P-value§ | Energy-adjusted<br>P-value |
| Isoleucine           | 3.17 ± 0.14              | 3.69 ± 0.19    | < 0.0328 | 0.2327                     | 3.66 ± 0.18               | 3.53 ± 0.37   | 0.7297   | < 0.2998                   |
| Leucine              | 5.35 ± 0.22              | 6.35 ± 0.29    | < 0.0071 | 0.0961                     | 6.13 ± 0.31               | 6.27 ± 0.66   | 0.8346   | < 0.276                    |
| Valine               | 3.57 ± 0.14              | 4.03 ± 0.17    | < 0.052  | 0.1354                     | 4.08 ± 0.19               | 3.94 ± 0.40   | 0.7353   | < 0.2024                   |
| BCAA                 | 12.10 ± 0.51             | 14.05 ± 0.63   | < 0.0191 | 0.1387                     | 13.87 ± 0.69              | 13.88 ± 1.47  | 0.9989   | < 0.2399                   |

\*Obesity was considered with BMI > 30 kg/m<sup>2</sup>

§ANOVA test; Values are expressed as mean ± SE

**Table S7.** Mean intake of total and individual BCAA (g/d) stratified by gender in MEDIGENE surveys compared to other international studies.

| Mean<br>intake (g/d) | MEDIGENE*     |               | Ishikawa-Takata<br>& Takimoto [61] |       | Suga et al.<br>[40] |       | Suga et al.<br>[63] |       | Ishihara et al.<br>Cohort I [62] |       | Ishihara et al.<br>Cohort II [62] |       |
|----------------------|---------------|---------------|------------------------------------|-------|---------------------|-------|---------------------|-------|----------------------------------|-------|-----------------------------------|-------|
|                      | F<br>(n = 73) | M<br>(n = 46) | F                                  | M     | F                   | M     | F                   | M     | F                                | M     | F                                 | M     |
| Isoleucine           | 3.39          | 3.63          | 3.70                               | 4.40  | 2.85                | 3.37  | 2.84                | 3.40  | 3.51                             | 4.22  | 3.421                             | 4.10  |
| Leucine              | 5.76          | 6.16          | 6.50                               | 7.60  | 5.09                | 6.03  | 5.06                | 6.08  | 6.07                             | 7.31  | 5.912                             | 7.09  |
| Valine               | 3.76          | 4.04          | 4.50                               | 5.20  | 3.36                | 3.98  | 3.34                | 4.01  | 4.20                             | 5.05  | 4.11                              | 4.91  |
| BCAA                 | 12.91         | 13.84         | 14.70                              | 17.20 | 11.31               | 13.38 | 11.24               | 13.49 | 13.78                            | 16.59 | 13.44                             | 16.10 |
